# Supplementary material
Source: Springer Nature journal article supplement (https://www.springermedizin.de/resource/supplementary/13024_2012_355_MOESM9_ESM.pdf/9643838)

A

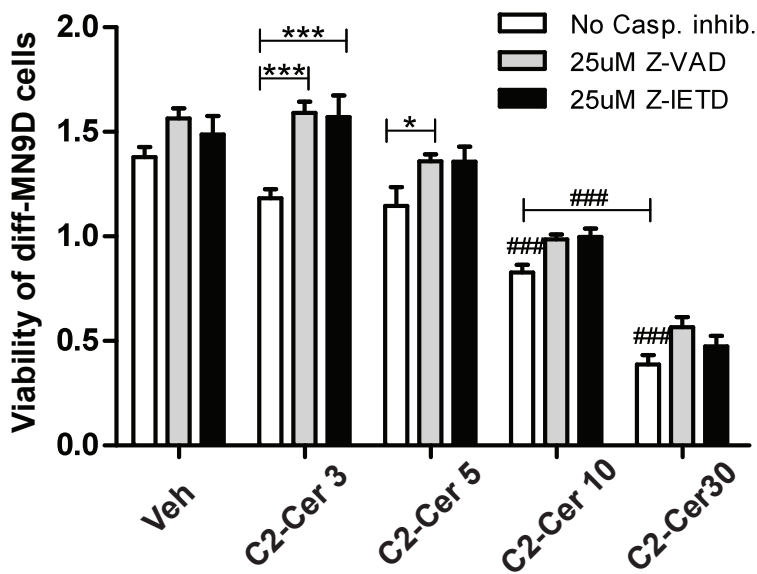

B

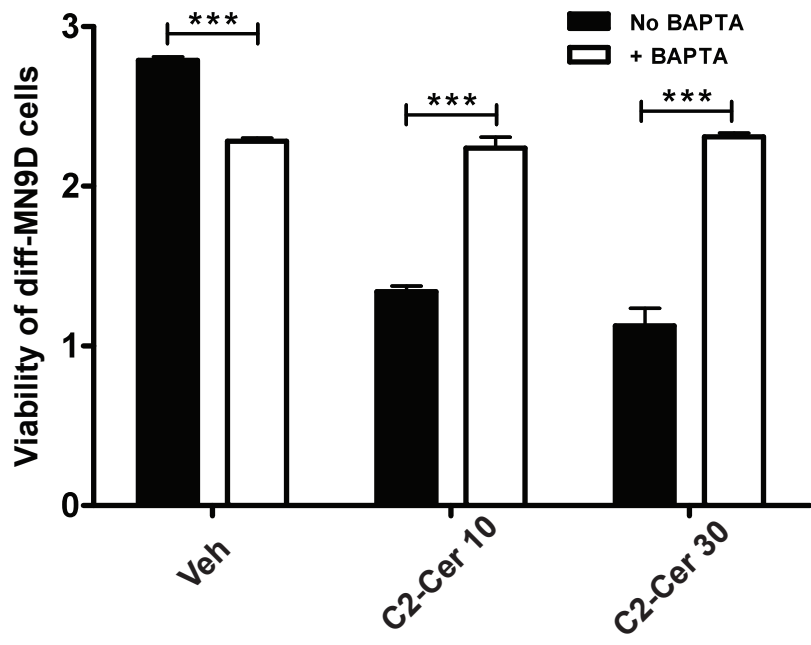

Supplement: MOESM9 [file 9643838]
